# Supplementary material for: Isolation and characterization of a bacterial strain Hydrogenophaga sp. PYR1 for anaerobic pyrene and benzo[a]pyrene biodegradation
Source: Royal Society of Chemistry journal article supplement (doi:10.1039/c7ra09274a), 2017-01-01
Supplement: c7ra09274a1.pdf [file c7ra09274a1.pdf]

## Supporting Information

### **Isolation and characterization of a bacterial strain *Hydrogenophaga* sp. PYR1 for anaerobic pyrene and benzo[*a*]pyrene biodegradation**

Zaisheng Yan<sup>a\*</sup>, Yu Zhang<sup>a,b</sup>, Huifang Wu<sup>b\*</sup>, Mingzhong Yang<sup>a,b</sup>, Haichen Zhang<sup>a,b</sup>,  
Zheng Hao<sup>a,c</sup>, Helong Jiang<sup>a</sup>

<sup>a</sup> *State Key Laboratory of Lake Science and Environment, Nanjing Institute of  
Geography and Limnology, Chinese Academy of Sciences, Nanjing, 210008, China*

<sup>b</sup> *College of Environment, Nanjing University of Technology, Nanjing, 211816,  
China*

<sup>c</sup> *University of Chinese Academy of Sciences, Beijing, China*

\*Corresponding author. Mail address: Nanjing Institute of Geography and  
Limnology, Chinese Academy of Sciences, 73 East Beijing Road, Nanjing  
210008, China. Tel./fax: 0086-25-8688 2210. E-mail: [zshyan@niglas.ac.cn](mailto:zshyan@niglas.ac.cn)  
(Z.S. Yan); Mail address: College of Environment, Nanjing University of  
Technology, Nanjing, 211816, China. E-mail: [whfkhl@sina.com](mailto:whfkhl@sina.com)

**Number of pages: 3**

**Number of figures: 1**

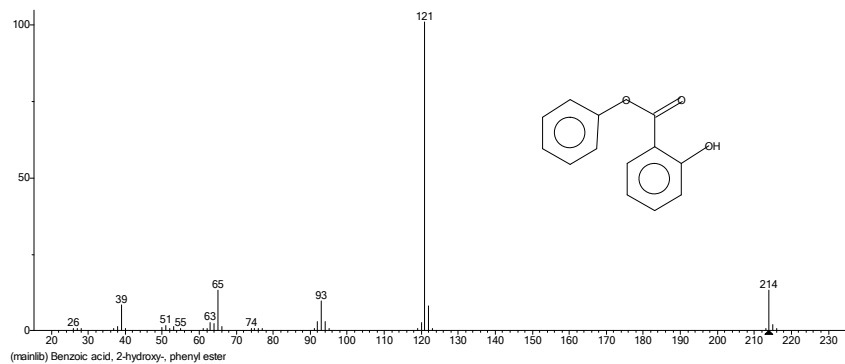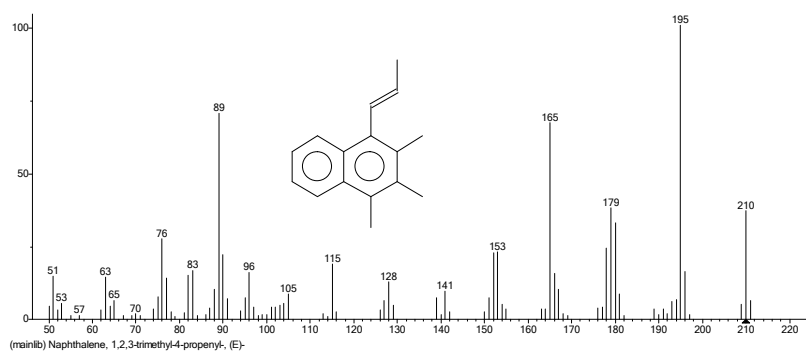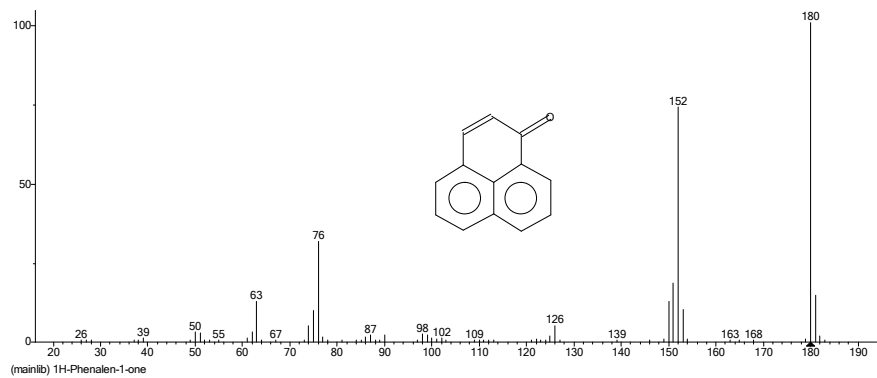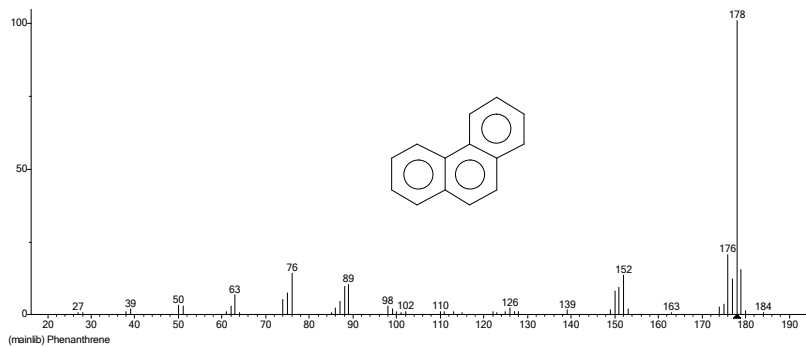

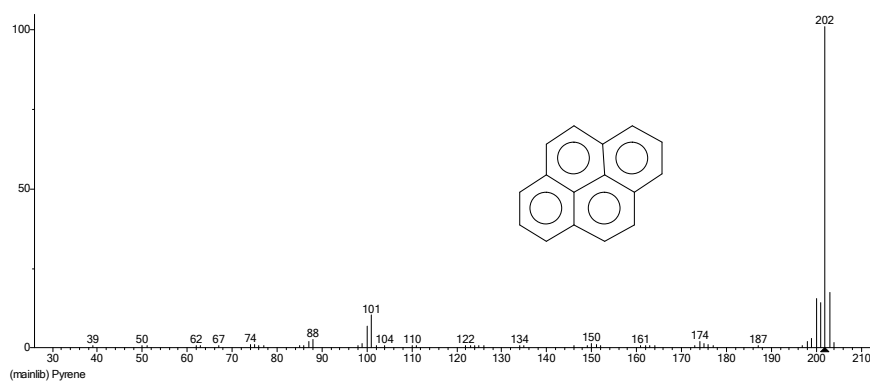

**Fig.S1.** The main metabolites of benzo[*a*]pyrene were identified from the GC-MS data.
